# Supplementary material for: A two-step process for preparation of dodecanethiol-capped Au nanoparticles with room-temperature spontaneous magnetization
Source: Royal Society of Chemistry journal article supplement (doi:10.1039/c3nj00516j), 2013-01-01
Supplement: c3nj00516j.pdf [file c3nj00516j.pdf]

## Supporting Information

### A two-step process for preparation of dodecanethiol-capped Au nanoparticles with room-temperature spontaneous magnetization

Hao Zhang,<sup>a</sup> Eider Goikolea,<sup>b</sup> Jose S. Garitaonandia,<sup>b</sup> Daniel Ortega,<sup>c</sup> Kei Saito,<sup>\*d</sup> and Kiyonori Suzuki<sup>\*a</sup>

<sup>a</sup> Department of Materials Engineering, Monash University, Clayton, VIC, Australia.

<sup>b</sup> Zientzia eta Teknologia Fakultatea, Euskal Herriko Unibertsitatea, UPV/EHU, Bilbao, Spain.

<sup>c</sup> Department of Physics and Astronomy, University College London, Gower Street, London WC1E 6BT, United Kingdom.

<sup>d</sup> School of Chemistry, Monash University, Clayton, VIC, Australia.

E-mail: kei.saito@monash.edu/kiyonori.suzuki@monash.edu

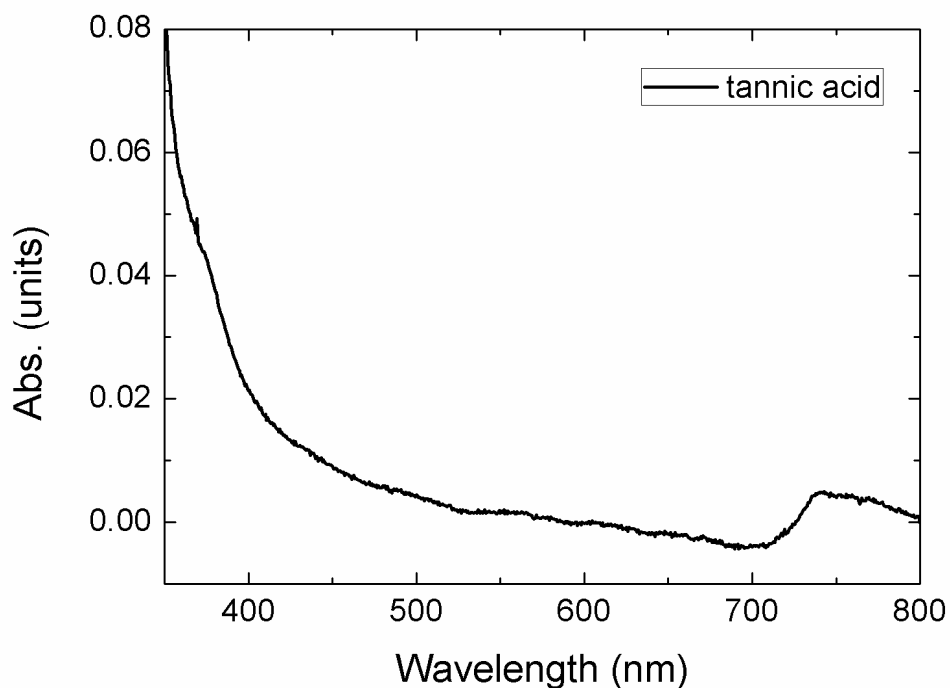

Figure S1. UV-vis spectrum for tannic acid aqueous solution.

The small Au nanoparticles (NPs) are prepared by 0.026 mM HAuCl<sub>4</sub> and 0.89 mM tannic acid with 20 minutes stirring. Figure S2 shows a bright-field transmission electron micrograph of the Au NPs. Small Au NPs with a mean particle size of 1.8 nm is seen. In Figure S3 we show the room-temperature M-H curve of these bare Au NPs. Although the susceptibility changes slightly in the low field range, the M-H curve is governed heavily by the diamagnetism of nonmagnetic gold.

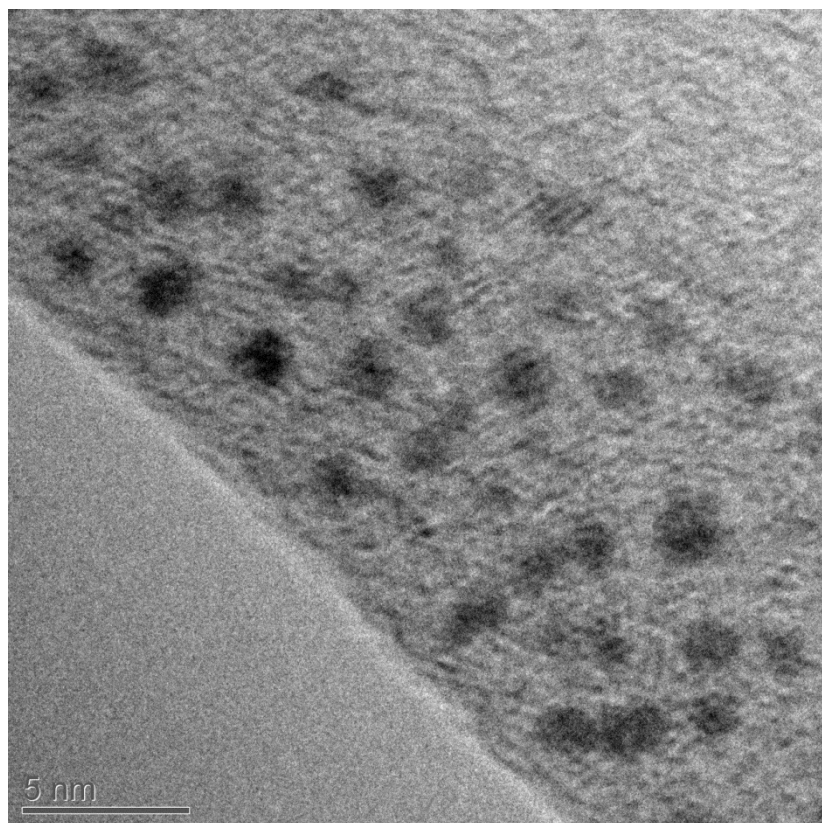

Figure S2. Bright-field transmission electron micrograph of Au NPs prepared by 0.026 mM  $\text{HAuCl}_4$  and 0.89 mM tannic acid.

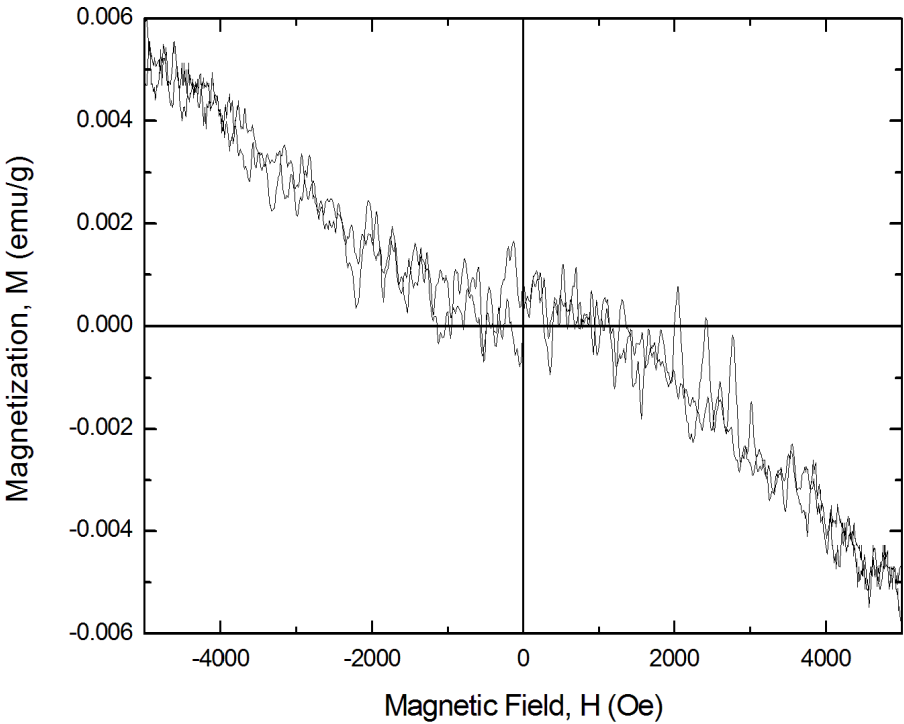

Figure S3. M-H curve of bare Au NPs at room temperature.
